# Supplementary material
Source: MDPI journal article supplement (https://www.mdpi.com/2075-1680/12/5/427)
Supplement: s1 [file s1]

## Supplementary Materials

# Statistical Analysis of Inverse Lindley Data Using Adaptive Type-II Progressively Hybrid Censoring with Applications

Refah Alotaibi <sup>1</sup>, Mazen Nassar <sup>2,3</sup> and Ahmed Elshahhat <sup>4\*</sup>

<sup>1</sup> Department of Mathematical Sciences, College of Science, Princess Nourah bint Abdulrahman University, P.O. Box 84428, Riyadh 11671, Saudi Arabia

<sup>2</sup> Department of Statistics, Faculty of Science, King Abdulaziz University, Jeddah 21589, Saudi Arabia

<sup>3</sup> Department of Statistics, Faculty of Commerce, Zagazig University, Egypt

<sup>4</sup> Faculty of Technology and Development, Zagazig University, Zagazig 44519, Egypt

---

\*Email: aelshahhat@ftd.zu.edu.eg

Table S1: The AEs ( $1^{st}$  column), RMSEs ( $2^{nd}$  column) and MRABs ( $3^{rd}$  column) of  $\mu$  when  $\mu = 0.5$ .

| $T$                  | $(n, m)$ | Scheme | MLE    |        |        | SE     |        |        |        | GE     |        |        |        |        |
|----------------------|----------|--------|--------|--------|--------|--------|--------|--------|--------|--------|--------|--------|--------|--------|
| Prior $\rightarrow$  |          |        |        |        |        |        | 1      | 2      |        |        | 1      | 2      |        |        |
| $\delta \rightarrow$ |          |        |        |        |        |        |        |        |        |        |        |        |        |        |
|                      |          |        |        |        |        |        |        |        |        | -2     |        |        | +2     |        |
| 0.5                  | (40,12)  | 1      | 0.5460 | 0.0776 | 0.1195 | 0.5441 | 0.0577 | 0.1026 | 0.5454 | 0.0454 | 0.0908 | 0.5401 | 0.0401 | 0.0801 |
|                      |          |        |        |        |        | 0.5222 | 0.0242 | 0.0448 | 0.5223 | 0.0223 | 0.0447 | 0.5220 | 0.0220 | 0.0440 |
|                      |          | 2      | 0.5177 | 0.0632 | 0.0983 | 0.5276 | 0.0468 | 0.0846 | 0.5290 | 0.0291 | 0.0579 | 0.5231 | 0.0234 | 0.0463 |
|                      |          |        |        |        |        | 0.5214 | 0.0235 | 0.0434 | 0.5215 | 0.0215 | 0.0431 | 0.5212 | 0.0212 | 0.0424 |
|                      |          | 3      | 0.5139 | 0.0603 | 0.0936 | 0.5393 | 0.0538 | 0.0963 | 0.5405 | 0.0406 | 0.0810 | 0.5352 | 0.0353 | 0.0704 |
|                      |          |        |        |        |        | 0.5235 | 0.0253 | 0.0472 | 0.5236 | 0.0236 | 0.0473 | 0.5233 | 0.0233 | 0.0466 |
|                      | (40,32)  | 1      | 0.5184 | 0.0550 | 0.0845 | 0.4738 | 0.0314 | 0.0540 | 0.4741 | 0.0259 | 0.0518 | 0.4728 | 0.0272 | 0.0544 |
|                      |          |        |        |        |        | 0.5141 | 0.0212 | 0.0331 | 0.5144 | 0.0144 | 0.0287 | 0.5134 | 0.0134 | 0.0268 |
|                      |          | 2      | 0.5138 | 0.0527 | 0.0821 | 0.4734 | 0.0317 | 0.0547 | 0.4737 | 0.0263 | 0.0526 | 0.4724 | 0.0276 | 0.0551 |
|                      |          |        |        |        |        | 0.5124 | 0.0179 | 0.0311 | 0.5126 | 0.0126 | 0.0252 | 0.5119 | 0.0120 | 0.0239 |
|                      |          | 3      | 0.5383 | 0.0562 | 0.0898 | 0.4955 | 0.0270 | 0.0518 | 0.4820 | 0.0181 | 0.0361 | 0.4807 | 0.0194 | 0.0387 |
|                      |          |        |        |        |        | 0.5124 | 0.0198 | 0.0309 | 0.5126 | 0.0126 | 0.0253 | 0.5117 | 0.0117 | 0.0234 |
|                      | (80,24)  | 1      | 0.5520 | 0.0690 | 0.1116 | 0.5264 | 0.0380 | 0.0663 | 0.5271 | 0.0272 | 0.0543 | 0.5242 | 0.0242 | 0.0485 |
|                      |          |        |        |        |        | 0.5219 | 0.0239 | 0.0438 | 0.5220 | 0.0220 | 0.0439 | 0.5216 | 0.0216 | 0.0432 |
|                      |          | 2      | 0.5143 | 0.0441 | 0.0686 | 0.5256 | 0.0374 | 0.0655 | 0.5263 | 0.0264 | 0.0527 | 0.5234 | 0.0234 | 0.0468 |
|                      |          |        |        |        |        | 0.5192 | 0.0215 | 0.0385 | 0.5193 | 0.0193 | 0.0386 | 0.5189 | 0.0189 | 0.0378 |
|                      |          | 3      | 0.5110 | 0.0426 | 0.0667 | 0.5214 | 0.0356 | 0.0621 | 0.5221 | 0.0222 | 0.0443 | 0.5189 | 0.0189 | 0.0378 |
|                      |          |        |        |        |        | 0.5164 | 0.0191 | 0.0333 | 0.5165 | 0.0165 | 0.0329 | 0.5161 | 0.0161 | 0.0322 |
|                      | (80,64)  | 1      | 0.5181 | 0.0415 | 0.0641 | 0.5024 | 0.0268 | 0.0412 | 0.5118 | 0.0118 | 0.0235 | 0.5003 | 0.0112 | 0.0115 |
|                      |          |        |        |        |        | 0.5116 | 0.0172 | 0.0298 | 0.5031 | 0.0104 | 0.0163 | 0.5111 | 0.0101 | 0.0152 |
|                      |          | 2      | 0.5120 | 0.0382 | 0.0595 | 0.5037 | 0.0266 | 0.0412 | 0.5044 | 0.0145 | 0.0188 | 0.5016 | 0.0119 | 0.0133 |
|                      |          |        |        |        |        | 0.5045 | 0.0156 | 0.0250 | 0.5047 | 0.0117 | 0.0147 | 0.5038 | 0.0108 | 0.0126 |
|                      |          | 3      | 0.5372 | 0.0379 | 0.0577 | 0.4816 | 0.0255 | 0.0414 | 0.4962 | 0.0141 | 0.0207 | 0.4933 | 0.0137 | 0.0195 |
|                      |          |        |        |        |        | 0.5102 | 0.0160 | 0.0271 | 0.5103 | 0.0104 | 0.0176 | 0.5097 | 0.0098 | 0.0125 |
| 2.5                  | (40,12)  | 1      | 0.5438 | 0.0816 | 0.1227 | 0.5340 | 0.0507 | 0.0912 | 0.5353 | 0.0354 | 0.0707 | 0.5297 | 0.0298 | 0.0593 |
|                      |          |        |        |        |        | 0.5222 | 0.0242 | 0.0444 | 0.5223 | 0.0223 | 0.0446 | 0.5219 | 0.0219 | 0.0439 |
|                      |          | 2      | 0.5153 | 0.0642 | 0.0999 | 0.5243 | 0.0451 | 0.0816 | 0.4692 | 0.0308 | 0.0616 | 0.4680 | 0.0320 | 0.0640 |
|                      |          |        |        |        |        | 0.5191 | 0.0215 | 0.0384 | 0.5192 | 0.0192 | 0.0384 | 0.5189 | 0.0189 | 0.0377 |
|                      |          | 3      | 0.5139 | 0.0603 | 0.0936 | 0.5195 | 0.0428 | 0.0761 | 0.4727 | 0.0273 | 0.0546 | 0.4715 | 0.0285 | 0.0570 |
|                      |          |        |        |        |        | 0.5200 | 0.0222 | 0.0409 | 0.5201 | 0.0201 | 0.0401 | 0.5197 | 0.0197 | 0.0394 |
|                      | (40,32)  | 1      | 0.5170 | 0.0605 | 0.0928 | 0.4706 | 0.0339 | 0.0597 | 0.4709 | 0.0291 | 0.0581 | 0.4697 | 0.0303 | 0.0606 |
|                      |          |        |        |        |        | 0.5122 | 0.0179 | 0.0311 | 0.5124 | 0.0124 | 0.0248 | 0.5117 | 0.0117 | 0.0235 |
|                      |          | 2      | 0.5122 | 0.0569 | 0.0884 | 0.4689 | 0.0354 | 0.0629 | 0.5257 | 0.0258 | 0.0514 | 0.5197 | 0.0200 | 0.0394 |
|                      |          |        |        |        |        | 0.5124 | 0.0179 | 0.0311 | 0.5126 | 0.0126 | 0.0252 | 0.5119 | 0.0120 | 0.0239 |
|                      |          | 3      | 0.5118 | 0.0566 | 0.0877 | 0.4724 | 0.0324 | 0.0564 | 0.5209 | 0.0210 | 0.0418 | 0.5148 | 0.0152 | 0.0296 |
|                      |          |        |        |        |        | 0.5102 | 0.0160 | 0.0271 | 0.5103 | 0.0104 | 0.0207 | 0.5097 | 0.0098 | 0.0195 |
|                      | (80,24)  | 1      | 0.5503 | 0.0709 | 0.1119 | 0.5266 | 0.0380 | 0.0663 | 0.5273 | 0.0273 | 0.0546 | 0.5244 | 0.0244 | 0.0488 |
|                      |          |        |        |        |        | 0.5214 | 0.0235 | 0.0434 | 0.5215 | 0.0215 | 0.0431 | 0.5212 | 0.0212 | 0.0424 |
|                      |          | 2      | 0.5129 | 0.0451 | 0.0701 | 0.5258 | 0.0374 | 0.0654 | 0.5265 | 0.0265 | 0.0529 | 0.5236 | 0.0236 | 0.0471 |
|                      |          |        |        |        |        | 0.5185 | 0.0209 | 0.0383 | 0.5185 | 0.0186 | 0.0371 | 0.5182 | 0.0182 | 0.0364 |
|                      |          | 3      | 0.5110 | 0.0426 | 0.0667 | 0.5214 | 0.0356 | 0.0621 | 0.5221 | 0.0222 | 0.0443 | 0.5189 | 0.0189 | 0.0378 |
|                      |          |        |        |        |        | 0.5164 | 0.0191 | 0.0333 | 0.5165 | 0.0165 | 0.0329 | 0.5161 | 0.0161 | 0.0322 |
|                      | (80,64)  | 1      | 0.5175 | 0.0455 | 0.0702 | 0.5036 | 0.0268 | 0.0414 | 0.5043 | 0.0144 | 0.0225 | 0.5014 | 0.0128 | 0.0209 |
|                      |          |        |        |        |        | 0.5069 | 0.0168 | 0.0263 | 0.5071 | 0.0112 | 0.0142 | 0.5062 | 0.0102 | 0.0124 |
|                      |          | 2      | 0.5116 | 0.0417 | 0.0649 | 0.5037 | 0.0266 | 0.0412 | 0.5044 | 0.0145 | 0.0288 | 0.5016 | 0.0119 | 0.0115 |
|                      |          |        |        |        |        | 0.5026 | 0.0152 | 0.0247 | 0.5029 | 0.0129 | 0.0257 | 0.5020 | 0.0101 | 0.0104 |
|                      |          | 3      | 0.5113 | 0.0415 | 0.0645 | 0.4955 | 0.0270 | 0.0418 | 0.4962 | 0.0141 | 0.0176 | 0.4933 | 0.0107 | 0.0110 |
|                      |          |        |        |        |        | 0.5014 | 0.0150 | 0.0245 | 0.5016 | 0.0097 | 0.0123 | 0.5007 | 0.0086 | 0.0095 |

Table S2: The AEs (1<sup>st</sup> column), RMSEs (2<sup>nd</sup> column) and MRABs (3<sup>rd</sup> column) of  $\mu$  when  $\mu = 1.5$ .

| $T$                  | $(n, m)$ | Scheme | MLE    |        |        | SE     |        |        |        |        | GE     |        |        |        |
|----------------------|----------|--------|--------|--------|--------|--------|--------|--------|--------|--------|--------|--------|--------|--------|
| Prior $\rightarrow$  |          |        |        |        |        |        |        | 1      | 2      |        |        | 1      | 2      |        |
| $\delta \rightarrow$ |          |        |        |        |        |        |        |        |        |        | -2     |        | +2     |        |
| 0.5                  | (40,12)  | 1      | 1.5865 | 0.2597 | 0.1315 | 1.5935 | 0.1029 | 0.0624 | 1.5941 | 0.0941 | 0.0627 | 1.5918 | 0.0918 | 0.0612 |
|                      |          |        |        |        |        | 1.5243 | 0.0305 | 0.0166 | 1.5244 | 0.0244 | 0.0163 | 1.5240 | 0.0240 | 0.0160 |
|                      |          | 2      | 2.5356 | 1.3288 | 0.7926 | 1.6065 | 0.1159 | 0.0710 | 1.6072 | 0.1072 | 0.0715 | 1.6046 | 0.1046 | 0.0697 |
|                      |          |        |        |        |        | 1.5490 | 0.0503 | 0.0327 | 1.5491 | 0.0491 | 0.0327 | 1.5489 | 0.0489 | 0.0326 |
|                      |          | 3      | 2.7799 | 1.3921 | 0.8811 | 1.6065 | 0.1159 | 0.0710 | 1.6072 | 0.1072 | 0.0715 | 1.6046 | 0.1046 | 0.0697 |
|                      |          |        |        |        |        | 1.5490 | 0.0503 | 0.0327 | 1.5491 | 0.0491 | 0.0327 | 1.5489 | 0.0489 | 0.0326 |
|                      | (40,32)  | 1      | 1.5684 | 0.1905 | 0.0974 | 1.4532 | 0.0528 | 0.0323 | 1.4521 | 0.0479 | 0.0319 | 1.4518 | 0.0482 | 0.0322 |
|                      |          |        |        |        |        | 1.5238 | 0.0256 | 0.0159 | 1.5238 | 0.0238 | 0.0159 | 1.5237 | 0.0237 | 0.0158 |
|                      |          | 2      | 2.6465 | 1.3246 | 0.7407 | 1.5598 | 0.0706 | 0.0401 | 1.5602 | 0.0603 | 0.0402 | 1.5585 | 0.0585 | 0.0390 |
|                      |          |        |        |        |        | 1.5333 | 0.0388 | 0.0222 | 1.5334 | 0.0334 | 0.0223 | 1.5329 | 0.0329 | 0.0219 |
|                      |          | 3      | 2.8217 | 1.3772 | 0.8545 | 1.5598 | 0.0706 | 0.0401 | 1.5602 | 0.0603 | 0.0402 | 1.5585 | 0.0585 | 0.0390 |
|                      |          |        |        |        |        | 1.5333 | 0.0388 | 0.0222 | 1.5334 | 0.0334 | 0.0223 | 1.5329 | 0.0329 | 0.0219 |
|                      | (80,24)  | 1      | 1.5612 | 0.1928 | 0.0994 | 1.4520 | 0.0505 | 0.0320 | 1.4534 | 0.0466 | 0.0310 | 1.4526 | 0.0474 | 0.0316 |
|                      |          |        |        |        |        | 1.5137 | 0.0172 | 0.0196 | 1.5036 | 0.0139 | 0.0191 | 1.5136 | 0.0136 | 0.0190 |
|                      |          | 2      | 1.7884 | 0.3573 | 0.1968 | 1.5410 | 0.0480 | 0.0283 | 1.5412 | 0.0412 | 0.0274 | 1.5403 | 0.0403 | 0.0269 |
|                      |          |        |        |        |        | 1.5287 | 0.0303 | 0.0191 | 1.5287 | 0.0287 | 0.0192 | 1.5286 | 0.0286 | 0.0191 |
|                      |          | 3      | 1.7884 | 0.3573 | 0.1968 | 1.5410 | 0.0480 | 0.0283 | 1.5412 | 0.0412 | 0.0274 | 1.5403 | 0.0403 | 0.0269 |
|                      |          |        |        |        |        | 1.5287 | 0.0303 | 0.0191 | 1.5287 | 0.0287 | 0.0192 | 1.5286 | 0.0286 | 0.0191 |
|                      | (80,64)  | 1      | 1.5378 | 0.1326 | 0.0690 | 1.4767 | 0.0358 | 0.0188 | 1.4770 | 0.0231 | 0.0154 | 1.4760 | 0.0241 | 0.0160 |
|                      |          |        |        |        |        | 1.5036 | 0.0114 | 0.0165 | 1.5137 | 0.0137 | 0.0124 | 1.5035 | 0.0133 | 0.0123 |
|                      |          | 2      | 1.7605 | 0.3005 | 0.1743 | 1.4622 | 0.0411 | 0.0252 | 1.4623 | 0.0377 | 0.0251 | 1.4619 | 0.0381 | 0.0254 |
|                      |          |        |        |        |        | 1.5186 | 0.0230 | 0.0136 | 1.5187 | 0.0187 | 0.0125 | 1.5185 | 0.0185 | 0.0123 |
|                      |          | 3      | 1.7605 | 0.3005 | 0.1743 | 1.4622 | 0.0411 | 0.0252 | 1.4623 | 0.0377 | 0.0251 | 1.4619 | 0.0381 | 0.0254 |
|                      |          |        |        |        |        | 1.5186 | 0.0230 | 0.0136 | 1.5187 | 0.0187 | 0.0125 | 1.5185 | 0.0185 | 0.0123 |
| 2.5                  | (40,12)  | 1      | 1.5257 | 0.2613 | 0.1362 | 1.5753 | 0.0854 | 0.0503 | 1.5758 | 0.0758 | 0.0505 | 1.5737 | 0.0737 | 0.0492 |
|                      |          |        |        |        |        | 1.5175 | 0.0244 | 0.0130 | 1.5223 | 0.0223 | 0.0196 | 1.5222 | 0.0222 | 0.0148 |
|                      |          | 2      | 1.5208 | 0.2097 | 0.1093 | 1.5719 | 0.0823 | 0.0483 | 1.5725 | 0.0725 | 0.0483 | 1.5704 | 0.0704 | 0.0469 |
|                      |          |        |        |        |        | 1.5169 | 0.0239 | 0.0175 | 1.5220 | 0.0220 | 0.0199 | 1.5167 | 0.0167 | 0.0150 |
|                      |          | 3      | 1.5563 | 0.2036 | 0.1061 | 1.5685 | 0.0791 | 0.0463 | 1.5690 | 0.0690 | 0.0460 | 1.5670 | 0.0670 | 0.0447 |
|                      |          |        |        |        |        | 1.5166 | 0.0234 | 0.0198 | 1.5167 | 0.0224 | 0.0194 | 1.5223 | 0.0223 | 0.0193 |
|                      | (40,32)  | 1      | 1.5178 | 0.1929 | 0.1009 | 1.4461 | 0.0563 | 0.0360 | 1.4462 | 0.0538 | 0.0359 | 1.4458 | 0.0542 | 0.0361 |
|                      |          |        |        |        |        | 1.5223 | 0.0242 | 0.0149 | 1.5176 | 0.0176 | 0.0149 | 1.5172 | 0.0172 | 0.0115 |
|                      |          | 2      | 1.5160 | 0.1818 | 0.0953 | 1.4461 | 0.0563 | 0.0360 | 1.4462 | 0.0538 | 0.0359 | 1.4458 | 0.0542 | 0.0361 |
|                      |          |        |        |        |        | 1.5220 | 0.0240 | 0.0148 | 1.5170 | 0.0170 | 0.0147 | 1.5219 | 0.0219 | 0.0146 |
|                      |          | 3      | 1.5167 | 0.1985 | 0.1030 | 1.4471 | 0.0552 | 0.0353 | 1.4472 | 0.0528 | 0.0352 | 1.4468 | 0.0532 | 0.0354 |
|                      |          |        |        |        |        | 1.5224 | 0.0243 | 0.0174 | 1.5224 | 0.0167 | 0.0150 | 1.5065 | 0.0165 | 0.0149 |
|                      | (80,24)  | 1      | 1.5152 | 0.1976 | 0.1036 | 1.4776 | 0.0351 | 0.0201 | 1.4779 | 0.0222 | 0.0148 | 1.4769 | 0.0232 | 0.0195 |
|                      |          |        |        |        |        | 1.5144 | 0.0177 | 0.0174 | 1.5067 | 0.0167 | 0.0145 | 1.5065 | 0.0165 | 0.0154 |
|                      |          | 2      | 1.5087 | 0.1460 | 0.0766 | 1.4782 | 0.0347 | 0.0201 | 1.4784 | 0.0217 | 0.0144 | 1.4775 | 0.0226 | 0.0199 |
|                      |          |        |        |        |        | 1.5149 | 0.0179 | 0.0126 | 1.5070 | 0.0170 | 0.0146 | 1.5163 | 0.0163 | 0.0109 |
|                      |          | 3      | 1.5583 | 0.1518 | 0.0779 | 1.4771 | 0.0354 | 0.0201 | 1.4774 | 0.0227 | 0.0151 | 1.4764 | 0.0237 | 0.0157 |
|                      |          |        |        |        |        | 1.5140 | 0.0175 | 0.0150 | 1.5141 | 0.0167 | 0.0145 | 1.5148 | 0.0148 | 0.0143 |
|                      | (80,64)  | 1      | 1.5119 | 0.1385 | 0.0727 | 1.5191 | 0.0343 | 0.0184 | 1.5194 | 0.0194 | 0.0129 | 1.5183 | 0.0183 | 0.0143 |
|                      |          |        |        |        |        | 1.5066 | 0.0138 | 0.0100 | 1.5144 | 0.0144 | 0.0117 | 1.5143 | 0.0143 | 0.0122 |
|                      |          | 2      | 1.5108 | 0.1295 | 0.0681 | 1.5191 | 0.0343 | 0.0181 | 1.5194 | 0.0194 | 0.0129 | 1.5183 | 0.0183 | 0.0122 |
|                      |          |        |        |        |        | 1.5069 | 0.0139 | 0.0102 | 1.5149 | 0.0149 | 0.0114 | 1.5068 | 0.0128 | 0.0111 |
|                      |          | 3      | 1.5050 | 0.1396 | 0.0740 | 1.5177 | 0.0342 | 0.0186 | 1.5180 | 0.0180 | 0.0120 | 1.5168 | 0.0169 | 0.0125 |
|                      |          |        |        |        |        | 1.5066 | 0.0138 | 0.0124 | 1.5067 | 0.0141 | 0.0111 | 1.5139 | 0.0139 | 0.0112 |

Table S3: The AEs ( $1^{st}$  column), RMSEs ( $2^{nd}$  column) and MRABs ( $3^{rd}$  column) of  $R(t)$  when  $\mu = 0.5$ .

| $T$                  | $(n, m)$ | Scheme | MLE    |        |        | SE     |        |        | GE     |        |        |        |        |        |  |
|----------------------|----------|--------|--------|--------|--------|--------|--------|--------|--------|--------|--------|--------|--------|--------|--|
| Prior $\rightarrow$  |          |        |        |        |        |        |        | 1      | 2      |        | 1      | 2      |        |        |  |
| $\delta \rightarrow$ |          |        |        |        |        |        |        |        |        | -2     |        |        | +2     |        |  |
| 0.5                  | (40,12)  | 1      | 0.7234 | 0.0669 | 0.0791 | 0.7249 | 0.0536 | 0.0706 | 0.7257 | 0.0415 | 0.0606 | 0.7222 | 0.0380 | 0.0555 |  |
|                      |          |        |        |        |        | 0.7062 | 0.0238 | 0.0323 | 0.7062 | 0.0220 | 0.0321 | 0.7060 | 0.0218 | 0.0318 |  |
|                      |          | 2      | 0.6969 | 0.0590 | 0.0694 | 0.7095 | 0.0455 | 0.0604 | 0.6558 | 0.0284 | 0.0415 | 0.6547 | 0.0295 | 0.0431 |  |
|                      |          |        |        |        |        | 0.7054 | 0.0231 | 0.0313 | 0.7054 | 0.0212 | 0.0310 | 0.7052 | 0.0210 | 0.0307 |  |
|                      |          | 3      | 0.7162 | 0.0605 | 0.0717 | 0.7204 | 0.0505 | 0.0669 | 0.7213 | 0.0371 | 0.0542 | 0.7177 | 0.0336 | 0.0489 |  |
|                      |          |        |        |        |        | 0.7074 | 0.0249 | 0.0339 | 0.7075 | 0.0232 | 0.0340 | 0.7072 | 0.0230 | 0.0336 |  |
|                      | (40,32)  | 1      | 0.6990 | 0.0513 | 0.0597 | 0.7093 | 0.0365 | 0.0470 | 0.7098 | 0.0256 | 0.0374 | 0.7077 | 0.0235 | 0.0344 |  |
|                      |          |        |        |        |        | 0.7058 | 0.0234 | 0.0315 | 0.7058 | 0.0216 | 0.0316 | 0.7056 | 0.0214 | 0.0313 |  |
|                      |          | 2      | 0.6946 | 0.0502 | 0.0587 | 0.7085 | 0.0360 | 0.0465 | 0.7105 | 0.0264 | 0.0384 | 0.7070 | 0.0227 | 0.0332 |  |
|                      |          |        |        |        |        | 0.7032 | 0.0212 | 0.0279 | 0.7033 | 0.0191 | 0.0278 | 0.6961 | 0.0188 | 0.0174 |  |
|                      |          | 3      | 0.6935 | 0.0569 | 0.0666 | 0.7043 | 0.0346 | 0.0445 | 0.7049 | 0.0207 | 0.0302 | 0.6637 | 0.0205 | 0.0300 |  |
|                      |          |        |        |        |        | 0.6964 | 0.0194 | 0.0223 | 0.7005 | 0.0163 | 0.0238 | 0.6940 | 0.0198 | 0.0142 |  |
|                      | (80,24)  | 1      | 0.7311 | 0.0611 | 0.0745 | 0.6560 | 0.0341 | 0.0424 | 0.6563 | 0.0280 | 0.0409 | 0.6551 | 0.0291 | 0.0425 |  |
|                      |          |        |        |        |        | 0.6980 | 0.0207 | 0.0238 | 0.6982 | 0.0140 | 0.0204 | 0.6975 | 0.0133 | 0.0194 |  |
|                      |          | 2      | 0.6962 | 0.0423 | 0.0491 | 0.6556 | 0.0344 | 0.0430 | 0.7090 | 0.0248 | 0.0362 | 0.7061 | 0.0222 | 0.0320 |  |
|                      |          |        |        |        |        | 0.6965 | 0.0177 | 0.0226 | 0.6886 | 0.0144 | 0.0164 | 0.6880 | 0.0138 | 0.0175 |  |
|                      |          | 3      | 0.7192 | 0.0511 | 0.0614 | 0.6645 | 0.0286 | 0.0322 | 0.6648 | 0.0195 | 0.0284 | 0.7025 | 0.0184 | 0.0268 |  |
|                      |          |        |        |        |        | 0.7004 | 0.0189 | 0.0241 | 0.6965 | 0.0123 | 0.0180 | 0.7002 | 0.0160 | 0.0234 |  |
|                      | (80,64)  | 1      | 0.7004 | 0.0393 | 0.0455 | 0.6857 | 0.0275 | 0.0308 | 0.6863 | 0.0124 | 0.0130 | 0.6840 | 0.0112 | 0.0115 |  |
|                      |          |        |        |        |        | 0.6957 | 0.0171 | 0.0218 | 0.6958 | 0.0116 | 0.0169 | 0.6953 | 0.0111 | 0.0162 |  |
|                      |          | 2      | 0.6945 | 0.0370 | 0.0429 | 0.6870 | 0.0272 | 0.0306 | 0.6875 | 0.0135 | 0.0149 | 0.6854 | 0.0116 | 0.0199 |  |
|                      |          |        |        |        |        | 0.6884 | 0.0156 | 0.0184 | 0.6966 | 0.0124 | 0.0181 | 0.7030 | 0.0119 | 0.0155 |  |
|                      |          | 3      | 0.6930 | 0.0412 | 0.0481 | 0.6785 | 0.0274 | 0.0318 | 0.6791 | 0.0153 | 0.0174 | 0.6768 | 0.0176 | 0.0109 |  |
|                      |          |        |        |        |        | 0.6943 | 0.0159 | 0.0198 | 0.6944 | 0.0102 | 0.0149 | 0.6959 | 0.0117 | 0.0170 |  |
| 2.5                  | (40,12)  | 1      | 0.7205 | 0.0693 | 0.0808 | 0.7155 | 0.0483 | 0.0641 | 0.7164 | 0.0323 | 0.0471 | 0.6517 | 0.0325 | 0.0475 |  |
|                      |          |        |        |        |        | 0.7061 | 0.0237 | 0.0320 | 0.7062 | 0.0220 | 0.0321 | 0.7059 | 0.0217 | 0.0317 |  |
|                      |          | 2      | 0.6944 | 0.0602 | 0.0709 | 0.7063 | 0.0445 | 0.0587 | 0.6509 | 0.0333 | 0.0487 | 0.6498 | 0.0344 | 0.0503 |  |
|                      |          |        |        |        |        | 0.7031 | 0.0211 | 0.0278 | 0.7032 | 0.0190 | 0.0277 | 0.7030 | 0.0187 | 0.0274 |  |
|                      |          | 3      | 0.6935 | 0.0569 | 0.0666 | 0.7016 | 0.0429 | 0.0554 | 0.6548 | 0.0295 | 0.0430 | 0.6537 | 0.0305 | 0.0446 |  |
|                      |          |        |        |        |        | 0.7040 | 0.0219 | 0.0296 | 0.7040 | 0.0198 | 0.0289 | 0.7038 | 0.0198 | 0.0286 |  |
|                      | (40,32)  | 1      | 0.6967 | 0.0561 | 0.0655 | 0.6525 | 0.0368 | 0.0470 | 0.6528 | 0.0314 | 0.0459 | 0.7124 | 0.0284 | 0.0412 |  |
|                      |          |        |        |        |        | 0.7054 | 0.0231 | 0.0313 | 0.7054 | 0.0212 | 0.0310 | 0.7052 | 0.0210 | 0.0307 |  |
|                      |          | 2      | 0.6923 | 0.0540 | 0.0633 | 0.6506 | 0.0385 | 0.0496 | 0.7091 | 0.0249 | 0.0364 | 0.7071 | 0.0229 | 0.0334 |  |
|                      |          |        |        |        |        | 0.7025 | 0.0206 | 0.0278 | 0.7026 | 0.0183 | 0.0268 | 0.7023 | 0.0181 | 0.0264 |  |
|                      |          | 3      | 0.6919 | 0.0537 | 0.0628 | 0.6545 | 0.0351 | 0.0445 | 0.7049 | 0.0207 | 0.0302 | 0.7025 | 0.0184 | 0.0268 |  |
|                      |          |        |        |        |        | 0.7004 | 0.0189 | 0.0241 | 0.7005 | 0.0163 | 0.0238 | 0.6940 | 0.0196 | 0.0234 |  |
|                      | (80,24)  | 1      | 0.7290 | 0.0622 | 0.0743 | 0.7094 | 0.0365 | 0.0470 | 0.7099 | 0.0257 | 0.0376 | 0.7079 | 0.0237 | 0.0346 |  |
|                      |          |        |        |        |        | 0.6963 | 0.0177 | 0.0227 | 0.6910 | 0.0168 | 0.0100 | 0.6904 | 0.0162 | 0.0190 |  |
|                      |          | 2      | 0.6946 | 0.0433 | 0.0503 | 0.7086 | 0.0360 | 0.0465 | 0.7073 | 0.0233 | 0.0338 | 0.7028 | 0.0189 | 0.0272 |  |
|                      |          |        |        |        |        | 0.6965 | 0.0177 | 0.0226 | 0.6868 | 0.0126 | 0.0181 | 0.6861 | 0.0120 | 0.0174 |  |
|                      |          | 3      | 0.6930 | 0.0412 | 0.0481 | 0.7043 | 0.0346 | 0.0443 | 0.7027 | 0.0187 | 0.0270 | 0.6768 | 0.0176 | 0.0201 |  |
|                      |          |        |        |        |        | 0.6943 | 0.0159 | 0.0198 | 0.6855 | 0.0114 | 0.0018 | 0.7002 | 0.0160 | 0.0142 |  |
|                      | (80,64)  | 1      | 0.6994 | 0.0430 | 0.0498 | 0.6869 | 0.0274 | 0.0308 | 0.6874 | 0.0134 | 0.0146 | 0.6852 | 0.0114 | 0.0118 |  |
|                      |          |        |        |        |        | 0.6909 | 0.0166 | 0.0192 | 0.6964 | 0.0122 | 0.0178 | 0.6959 | 0.0117 | 0.0171 |  |
|                      |          | 2      | 0.6937 | 0.0402 | 0.0468 | 0.6870 | 0.0272 | 0.0306 | 0.6875 | 0.0135 | 0.0149 | 0.6854 | 0.0116 | 0.0120 |  |
|                      |          |        |        |        |        | 0.6866 | 0.0152 | 0.0182 | 0.6966 | 0.0124 | 0.0137 | 0.6961 | 0.0119 | 0.0128 |  |
|                      |          | 3      | 0.6934 | 0.0401 | 0.0465 | 0.6785 | 0.0286 | 0.0318 | 0.6791 | 0.0153 | 0.0174 | 0.6980 | 0.0143 | 0.0109 |  |
|                      |          |        |        |        |        | 0.6853 | 0.0151 | 0.0182 | 0.6944 | 0.0102 | 0.0149 | 0.6848 | 0.0119 | 0.0110 |  |

Table S4: The AEs ( $1^{st}$  column), RMSEs ( $2^{nd}$  column) and MRABs ( $3^{rd}$  column) of  $R(t)$  when  $\mu = 1.5$ .

| $T$                  | $(n, m)$ | Scheme | MLE    |        |        | SE     |        |        | GE     |        |        |        |        |        |  |
|----------------------|----------|--------|--------|--------|--------|--------|--------|--------|--------|--------|--------|--------|--------|--------|--|
| Prior $\rightarrow$  |          |        |        |        |        | 1      |        |        | 1      |        |        |        |        |        |  |
|                      |          |        |        |        |        | 2      |        |        | 2      |        |        |        |        |        |  |
| $\delta \rightarrow$ |          |        |        |        |        |        |        |        | -2     |        |        |        | +2     |        |  |
| 0.5                  | (40,12)  | 1      | 0.9912 | 0.0079 | 0.0055 | 0.9940 | 0.0026 | 0.0025 | 0.9940 | 0.0025 | 0.0025 | 0.9940 | 0.0025 | 0.0025 |  |
|                      |          |        |        |        |        | 0.9923 | 0.0009 | 0.0008 | 0.9923 | 0.0007 | 0.0007 | 0.9923 | 0.0007 | 0.0007 |  |
|                      |          | 2      | 0.9959 | 0.0085 | 0.0080 | 0.9943 | 0.0029 | 0.0028 | 0.9943 | 0.0027 | 0.0028 | 0.9943 | 0.0027 | 0.0028 |  |
|                      |          |        |        |        |        | 0.9926 | 0.0011 | 0.0010 | 0.9926 | 0.0010 | 0.0010 | 0.9926 | 0.0010 | 0.0010 |  |
|                      |          | 3      | 0.9997 | 0.0084 | 0.0083 | 0.9943 | 0.0029 | 0.0028 | 0.9943 | 0.0027 | 0.0028 | 0.9943 | 0.0027 | 0.0028 |  |
|                      |          |        |        |        |        | 0.9926 | 0.0011 | 0.0010 | 0.9926 | 0.0010 | 0.0010 | 0.9926 | 0.0010 | 0.0010 |  |
|                      | (40,32)  | 1      | 0.9920 | 0.0050 | 0.0040 | 0.9899 | 0.0019 | 0.0018 | 0.9899 | 0.0017 | 0.0017 | 0.9899 | 0.0017 | 0.0017 |  |
|                      |          |        |        |        |        | 0.9920 | 0.0005 | 0.0004 | 0.9920 | 0.0004 | 0.0004 | 0.9920 | 0.0004 | 0.0004 |  |
|                      |          | 2      | 0.9963 | 0.0054 | 0.0051 | 0.9932 | 0.0019 | 0.0017 | 0.9932 | 0.0017 | 0.0017 | 0.9932 | 0.0017 | 0.0017 |  |
|                      |          |        |        |        |        | 0.9930 | 0.0015 | 0.0014 | 0.9930 | 0.0014 | 0.0014 | 0.9930 | 0.0014 | 0.0014 |  |
|                      |          | 3      | 0.9963 | 0.0054 | 0.0051 | 0.9928 | 0.0019 | 0.0017 | 0.9932 | 0.0017 | 0.0017 | 0.9932 | 0.0017 | 0.0017 |  |
|                      |          |        |        |        |        | 0.9921 | 0.0015 | 0.0014 | 0.9930 | 0.0014 | 0.0014 | 0.9930 | 0.0014 | 0.0014 |  |
|                      | (80,24)  | 1      | 0.9917 | 0.0058 | 0.0043 | 0.9899 | 0.0018 | 0.0017 | 0.9899 | 0.0017 | 0.0017 | 0.9899 | 0.0017 | 0.0017 |  |
|                      |          |        |        |        |        | 0.9923 | 0.0008 | 0.0007 | 0.9923 | 0.0007 | 0.0007 | 0.9923 | 0.0007 | 0.0007 |  |
|                      |          | 2      | 0.9976 | 0.0081 | 0.0076 | 0.9902 | 0.0015 | 0.0013 | 0.9902 | 0.0013 | 0.0013 | 0.9902 | 0.0013 | 0.0013 |  |
|                      |          |        |        |        |        | 0.9924 | 0.0009 | 0.0009 | 0.9924 | 0.0009 | 0.0009 | 0.9924 | 0.0009 | 0.0009 |  |
|                      |          | 3      | 0.9999 | 0.0073 | 0.0074 | 0.9902 | 0.0015 | 0.0013 | 0.9902 | 0.0013 | 0.0013 | 0.9902 | 0.0013 | 0.0013 |  |
|                      |          |        |        |        |        | 0.9924 | 0.0009 | 0.0009 | 0.9924 | 0.0009 | 0.0009 | 0.9924 | 0.0009 | 0.0009 |  |
|                      | (80,64)  | 1      | 0.9919 | 0.0037 | 0.0030 | 0.9907 | 0.0013 | 0.0010 | 0.9907 | 0.0008 | 0.0008 | 0.9907 | 0.0008 | 0.0008 |  |
|                      |          |        |        |        |        | 0.9917 | 0.0004 | 0.0003 | 0.9917 | 0.0001 | 0.0001 | 0.9917 | 0.0001 | 0.0001 |  |
|                      |          | 2      | 0.9964 | 0.0052 | 0.0049 | 0.9928 | 0.0014 | 0.0012 | 0.9928 | 0.0012 | 0.0012 | 0.9928 | 0.0012 | 0.0012 |  |
|                      |          |        |        |        |        | 0.9921 | 0.0007 | 0.0006 | 0.9921 | 0.0006 | 0.0006 | 0.9921 | 0.0006 | 0.0006 |  |
|                      |          | 3      | 0.9964 | 0.0052 | 0.0049 | 0.9932 | 0.0014 | 0.0012 | 0.9928 | 0.0012 | 0.0012 | 0.9928 | 0.0012 | 0.0012 |  |
|                      |          |        |        |        |        | 0.9930 | 0.0007 | 0.0006 | 0.9921 | 0.0006 | 0.0006 | 0.9921 | 0.0006 | 0.0006 |  |
| 2.5                  | (40,12)  | 1      | 0.9885 | 0.0113 | 0.0073 | 0.9936 | 0.0023 | 0.0021 | 0.9936 | 0.0020 | 0.0020 | 0.9936 | 0.0020 | 0.0020 |  |
|                      |          |        |        |        |        | 0.9921 | 0.0007 | 0.0006 | 0.9923 | 0.0007 | 0.0007 | 0.9923 | 0.0007 | 0.0007 |  |
|                      |          | 2      | 0.9897 | 0.0079 | 0.0055 | 0.9935 | 0.0022 | 0.0020 | 0.9935 | 0.0020 | 0.0020 | 0.9935 | 0.0019 | 0.0020 |  |
|                      |          |        |        |        |        | 0.9921 | 0.0007 | 0.0006 | 0.9922 | 0.0007 | 0.0007 | 0.9922 | 0.0007 | 0.0007 |  |
|                      |          | 3      | 0.9899 | 0.0072 | 0.0052 | 0.9934 | 0.0021 | 0.0019 | 0.9934 | 0.0019 | 0.0019 | 0.9934 | 0.0019 | 0.0019 |  |
|                      |          |        |        |        |        | 0.9921 | 0.0007 | 0.0006 | 0.9923 | 0.0007 | 0.0007 | 0.9923 | 0.0007 | 0.0007 |  |
|                      | (40,32)  | 1      | 0.9900 | 0.0069 | 0.0051 | 0.9896 | 0.0020 | 0.0020 | 0.9896 | 0.0019 | 0.0020 | 0.9896 | 0.0019 | 0.0020 |  |
|                      |          |        |        |        |        | 0.9923 | 0.0007 | 0.0007 | 0.9921 | 0.0005 | 0.0005 | 0.9921 | 0.0005 | 0.0005 |  |
|                      |          | 2      | 0.9902 | 0.0064 | 0.0048 | 0.9896 | 0.0020 | 0.0020 | 0.9896 | 0.0019 | 0.0020 | 0.9896 | 0.0019 | 0.0020 |  |
|                      |          |        |        |        |        | 0.9922 | 0.0007 | 0.0007 | 0.9921 | 0.0005 | 0.0005 | 0.9921 | 0.0005 | 0.0005 |  |
|                      |          | 3      | 0.9913 | 0.0061 | 0.0046 | 0.9897 | 0.0020 | 0.0019 | 0.9897 | 0.0019 | 0.0019 | 0.9897 | 0.0019 | 0.0019 |  |
|                      |          |        |        |        |        | 0.9923 | 0.0007 | 0.0007 | 0.9921 | 0.0005 | 0.0005 | 0.9921 | 0.0005 | 0.0005 |  |
|                      | (80,24)  | 1      | 0.9898 | 0.0078 | 0.0054 | 0.9908 | 0.0013 | 0.0010 | 0.9908 | 0.0008 | 0.0008 | 0.9908 | 0.0008 | 0.0008 |  |
|                      |          |        |        |        |        | 0.9920 | 0.0005 | 0.0005 | 0.9920 | 0.0004 | 0.0004 | 0.9920 | 0.0004 | 0.0004 |  |
|                      |          | 2      | 0.9906 | 0.0051 | 0.0038 | 0.9908 | 0.0012 | 0.0010 | 0.9908 | 0.0008 | 0.0008 | 0.9908 | 0.0008 | 0.0008 |  |
|                      |          |        |        |        |        | 0.9920 | 0.0005 | 0.0005 | 0.9920 | 0.0005 | 0.0005 | 0.9920 | 0.0005 | 0.0005 |  |
|                      |          | 3      | 0.9906 | 0.0050 | 0.0037 | 0.9908 | 0.0013 | 0.0010 | 0.9908 | 0.0008 | 0.0008 | 0.9908 | 0.0008 | 0.0008 |  |
|                      |          |        |        |        |        | 0.9920 | 0.0005 | 0.0005 | 0.9920 | 0.0004 | 0.0004 | 0.9920 | 0.0004 | 0.0004 |  |
|                      | (80,64)  | 1      | 0.9909 | 0.0047 | 0.0036 | 0.9921 | 0.0010 | 0.0009 | 0.9921 | 0.0005 | 0.0006 | 0.9921 | 0.0005 | 0.0005 |  |
|                      |          |        |        |        |        | 0.9918 | 0.0004 | 0.0004 | 0.9918 | 0.0002 | 0.0002 | 0.9918 | 0.0002 | 0.0002 |  |
|                      |          | 2      | 0.9910 | 0.0043 | 0.0033 | 0.9921 | 0.0010 | 0.0009 | 0.9921 | 0.0005 | 0.0006 | 0.9921 | 0.0005 | 0.0005 |  |
|                      |          |        |        |        |        | 0.9918 | 0.0004 | 0.0004 | 0.9918 | 0.0002 | 0.0002 | 0.9918 | 0.0002 | 0.0002 |  |
|                      |          | 3      | 0.9923 | 0.0041 | 0.0032 | 0.9921 | 0.0010 | 0.0009 | 0.9921 | 0.0005 | 0.0005 | 0.9921 | 0.0005 | 0.0005 |  |
|                      |          |        |        |        |        | 0.9918 | 0.0004 | 0.0004 | 0.9918 | 0.0002 | 0.0002 | 0.9918 | 0.0002 | 0.0002 |  |

Table S5: The AEs ( $1^{st}$  column), RMSEs ( $2^{nd}$  column) and MRABs ( $3^{rd}$  column) of  $h(t)$  when  $\mu = 0.5$ .

| $T$                  | $(n, m)$ | Scheme | MLE    |        |        | SE     |        |        |        | GE     |        |        |        |        |
|----------------------|----------|--------|--------|--------|--------|--------|--------|--------|--------|--------|--------|--------|--------|--------|
| Prior $\rightarrow$  |          |        |        |        |        |        |        | 1      | 2      |        | 1      | 2      |        |        |
| $\delta \rightarrow$ |          |        |        |        |        |        |        |        |        | -2     |        |        | +2     |        |
| 0.5                  | (40,12)  | 1      | 2.4018 | 0.3986 | 0.1200 | 2.4006 | 0.3108 | 0.1056 | 2.4091 | 0.2285 | 0.0865 | 2.3771 | 0.2603 | 0.0987 |
|                      |          |        |        |        |        | 2.5132 | 0.1348 | 0.0474 | 2.5137 | 0.1236 | 0.0469 | 2.5136 | 0.1237 | 0.0469 |
|                      |          | 2      | 2.5545 | 0.3397 | 0.1026 | 2.4897 | 0.2587 | 0.0890 | 2.4987 | 0.1395 | 0.0525 | 2.4654 | 0.1722 | 0.0652 |
|                      |          |        |        |        |        | 2.5175 | 0.1310 | 0.0459 | 2.5181 | 0.1192 | 0.0452 | 2.5282 | 0.1090 | 0.0413 |
|                      |          | 3      | 2.4458 | 0.3560 | 0.1078 | 2.4265 | 0.2917 | 0.0997 | 2.4349 | 0.2028 | 0.0767 | 2.4034 | 0.2340 | 0.0887 |
|                      |          |        |        |        |        | 2.5683 | 0.1102 | 0.0327 | 2.5065 | 0.1308 | 0.0496 | 2.5044 | 0.1329 | 0.0504 |
|                      | (40,32)  | 1      | 2.3619 | 0.3608 | 0.1128 | 2.4931 | 0.2087 | 0.0695 | 2.7932 | 0.1560 | 0.0591 | 2.4800 | 0.1573 | 0.0596 |
|                      |          |        |        |        |        | 2.5152 | 0.1329 | 0.0463 | 2.5158 | 0.1215 | 0.0461 | 2.5115 | 0.1258 | 0.0477 |
|                      |          | 2      | 2.5710 | 0.2871 | 0.0864 | 2.4974 | 0.2058 | 0.0687 | 2.7955 | 0.1583 | 0.0600 | 2.4844 | 0.1529 | 0.0580 |
|                      |          |        |        |        |        | 2.5300 | 0.1201 | 0.0408 | 2.5305 | 0.1067 | 0.0405 | 2.5543 | 0.0830 | 0.0315 |
|                      |          | 3      | 2.5744 | 0.3263 | 0.0981 | 2.5212 | 0.1970 | 0.0655 | 2.5263 | 0.1111 | 0.0421 | 2.5069 | 0.1305 | 0.0494 |
|                      |          |        |        |        |        | 2.5456 | 0.1069 | 0.0353 | 2.5462 | 0.0910 | 0.0345 | 2.5438 | 0.0934 | 0.0354 |
|                      | (80,24)  | 1      | 2.5460 | 0.2958 | 0.0882 | 2.7913 | 0.1852 | 0.0600 | 2.4976 | 0.1397 | 0.0529 | 2.7857 | 0.1485 | 0.0563 |
|                      |          |        |        |        |        | 2.5589 | 0.1174 | 0.0350 | 2.5604 | 0.0769 | 0.0292 | 2.5159 | 0.1214 | 0.0460 |
|                      |          | 2      | 2.5644 | 0.2416 | 0.0722 | 2.7936 | 0.1869 | 0.0609 | 2.5020 | 0.1353 | 0.0513 | 2.7880 | 0.1508 | 0.0572 |
|                      |          |        |        |        |        | 2.5678 | 0.1000 | 0.0331 | 2.5688 | 0.0685 | 0.0259 | 2.5649 | 0.0725 | 0.0275 |
|                      |          | 3      | 2.4329 | 0.2987 | 0.0921 | 2.6665 | 0.1569 | 0.0456 | 2.7468 | 0.1097 | 0.0415 | 2.7390 | 0.1019 | 0.0386 |
|                      |          |        |        |        |        | 2.5060 | 0.1410 | 0.0499 | 2.5697 | 0.0675 | 0.0256 | 2.5639 | 0.0734 | 0.0278 |
|                      | (80,64)  | 1      | 2.5421 | 0.2260 | 0.0671 | 2.6266 | 0.1528 | 0.0445 | 2.5735 | 0.0638 | 0.0242 | 2.6088 | 0.0286 | 0.0108 |
|                      |          |        |        |        |        | 2.5725 | 0.0965 | 0.0318 | 2.6310 | 0.0190 | 0.0129 | 2.6137 | 0.0245 | 0.0189 |
|                      |          | 2      | 2.5755 | 0.2105 | 0.0630 | 2.6194 | 0.1516 | 0.0444 | 2.6143 | 0.0232 | 0.0187 | 2.5696 | 0.0678 | 0.0257 |
|                      |          |        |        |        |        | 2.6130 | 0.0878 | 0.0268 | 2.6237 | 0.0151 | 0.0151 | 2.6068 | 0.0312 | 0.0116 |
|                      |          | 3      | 2.5829 | 0.2346 | 0.0705 | 2.7449 | 0.1496 | 0.0458 | 2.5813 | 0.0561 | 0.0212 | 2.5776 | 0.0598 | 0.0226 |
|                      |          |        |        |        |        | 2.5804 | 0.0895 | 0.0289 | 2.6709 | 0.0346 | 0.0127 | 2.6535 | 0.0182 | 0.0161 |
| 2.5                  | (40,12)  | 1      | 2.4168 | 0.4152 | 0.1229 | 2.4550 | 0.2769 | 0.0951 | 2.8117 | 0.1745 | 0.0662 | 2.4310 | 0.2065 | 0.0782 |
|                      |          |        |        |        |        | 2.5134 | 0.1344 | 0.0470 | 2.5140 | 0.1233 | 0.0468 | 2.5118 | 0.1255 | 0.0476 |
|                      |          | 2      | 2.5684 | 0.3459 | 0.1045 | 2.5079 | 0.2514 | 0.0862 | 2.8221 | 0.1849 | 0.0701 | 2.8149 | 0.1777 | 0.0673 |
|                      |          |        |        |        |        | 2.5257 | 0.1238 | 0.0434 | 2.5309 | 0.1064 | 0.0403 | 2.5286 | 0.1087 | 0.0412 |
|                      |          | 3      | 2.5744 | 0.3263 | 0.0981 | 2.5344 | 0.2408 | 0.0810 | 2.8011 | 0.1639 | 0.0621 | 2.7939 | 0.1567 | 0.0594 |
|                      |          |        |        |        |        | 2.5456 | 0.1069 | 0.0353 | 2.5262 | 0.1111 | 0.0421 | 2.5240 | 0.1133 | 0.0430 |
|                      | (40,32)  | 1      | 2.3731 | 0.3689 | 0.1128 | 2.4922 | 0.2086 | 0.0695 | 2.4638 | 0.1741 | 0.0658 | 2.8045 | 0.1673 | 0.0634 |
|                      |          |        |        |        |        | 2.5175 | 0.1310 | 0.0459 | 2.5181 | 0.1192 | 0.0452 | 2.5159 | 0.1214 | 0.0460 |
|                      |          | 2      | 2.5826 | 0.3092 | 0.0930 | 2.8203 | 0.2091 | 0.0702 | 2.5013 | 0.1360 | 0.0516 | 2.4832 | 0.1544 | 0.0584 |
|                      |          |        |        |        |        | 2.5341 | 0.1165 | 0.0407 | 2.5346 | 0.1027 | 0.0389 | 2.5324 | 0.1049 | 0.0398 |
|                      |          | 3      | 2.5846 | 0.3073 | 0.0923 | 2.5212 | 0.1970 | 0.0655 | 2.5263 | 0.1111 | 0.0421 | 2.5069 | 0.1305 | 0.0494 |
|                      |          |        |        |        |        | 2.5678 | 0.1000 | 0.0331 | 2.5462 | 0.0910 | 0.0345 | 2.5438 | 0.0934 | 0.0354 |
|                      | (80,24)  | 1      | 2.5566 | 0.3242 | 0.0968 | 2.8099 | 0.1999 | 0.0665 | 2.4967 | 0.1406 | 0.0533 | 2.4793 | 0.1580 | 0.0599 |
|                      |          |        |        |        |        | 2.5690 | 0.1000 | 0.0331 | 2.5700 | 0.0673 | 0.0255 | 2.5659 | 0.0714 | 0.0271 |
|                      |          | 2      | 2.5731 | 0.2473 | 0.0739 | 2.4968 | 0.2057 | 0.0686 | 2.5171 | 0.1214 | 0.0456 | 2.4839 | 0.1534 | 0.0582 |
|                      |          |        |        |        |        | 2.5303 | 0.1197 | 0.0407 | 2.5688 | 0.0685 | 0.0259 | 2.5649 | 0.0725 | 0.0275 |
|                      |          | 3      | 2.5829 | 0.2346 | 0.0705 | 2.7993 | 0.1909 | 0.0628 | 2.5437 | 0.0953 | 0.0355 | 2.5096 | 0.1281 | 0.0484 |
|                      |          |        |        |        |        | 2.5804 | 0.0895 | 0.0289 | 2.5813 | 0.0561 | 0.0212 | 2.5776 | 0.0598 | 0.0226 |
|                      | (80,64)  | 1      | 2.5466 | 0.2471 | 0.0735 | 2.6202 | 0.1526 | 0.0447 | 2.6008 | 0.0366 | 0.0138 | 2.5950 | 0.0423 | 0.0160 |
|                      |          |        |        |        |        | 2.5993 | 0.0939 | 0.0280 | 2.6246 | 0.0141 | 0.0148 | 2.6074 | 0.0305 | 0.0113 |
|                      |          | 2      | 2.5792 | 0.2291 | 0.0686 | 2.6194 | 0.1516 | 0.0444 | 2.6237 | 0.0151 | 0.0151 | 2.6068 | 0.0312 | 0.0116 |
|                      |          |        |        |        |        | 2.6233 | 0.0855 | 0.0265 | 2.6246 | 0.0131 | 0.0148 | 2.6191 | 0.0184 | 0.0169 |
|                      |          | 3      | 2.5808 | 0.2282 | 0.0682 | 2.6665 | 0.1569 | 0.0456 | 2.6709 | 0.0346 | 0.0127 | 2.6535 | 0.0182 | 0.0161 |
|                      |          |        |        |        |        | 2.6305 | 0.0847 | 0.0264 | 2.6318 | 0.0166 | 0.0121 | 2.6263 | 0.0115 | 0.0141 |

Table S6: The AEs ( $1^{st}$  column), RMSEs ( $2^{nd}$  column) and MRABs ( $3^{rd}$  column) of  $h(t)$  when  $\mu = 1.5$ .

| $T$                  | $(n, m)$ | Scheme | MLE    |        |        | SE     |        |        |        |        | GE     |        |        |        |
|----------------------|----------|--------|--------|--------|--------|--------|--------|--------|--------|--------|--------|--------|--------|--------|
| Prior $\rightarrow$  |          |        |        |        |        |        |        | 1      | 2      |        |        | 1      | 2      |        |
| $\delta \rightarrow$ |          |        |        |        |        |        |        |        |        |        | -2     |        | +2     |        |
| 0.5                  | (40,12)  | 1      | 0.1746 | 0.1232 | 0.5192 | 0.1355 | 0.0481 | 0.2471 | 0.1368 | 0.0432 | 0.2401 | 0.1319 | 0.0481 | 0.2673 |
|                      |          |        |        |        |        | 0.1672 | 0.0159 | 0.0730 | 0.1674 | 0.0126 | 0.0698 | 0.1663 | 0.0137 | 0.0758 |
|                      |          | 2      | 0.0787 | 0.1671 | 0.8808 | 0.1302 | 0.0533 | 0.2765 | 0.1316 | 0.0484 | 0.2688 | 0.1263 | 0.0537 | 0.2983 |
|                      |          |        |        |        |        | 0.1546 | 0.0260 | 0.1411 | 0.1629 | 0.0171 | 0.0949 | 0.1616 | 0.0183 | 0.1019 |
|                      |          | 3      | 0.0088 | 0.1744 | 0.9626 | 0.1302 | 0.0533 | 0.2765 | 0.1316 | 0.0484 | 0.2688 | 0.1263 | 0.0537 | 0.2983 |
|                      |          |        |        |        |        | 0.1546 | 0.0260 | 0.1416 | 0.1629 | 0.0171 | 0.0949 | 0.1616 | 0.0183 | 0.1019 |
|                      | (40,32)  | 1      | 0.1660 | 0.0858 | 0.3844 | 0.2085 | 0.0323 | 0.1608 | 0.2092 | 0.0292 | 0.1621 | 0.2082 | 0.0282 | 0.1567 |
|                      |          |        |        |        |        | 0.1672 | 0.0137 | 0.0302 | 0.1673 | 0.0127 | 0.0704 | 0.1670 | 0.0130 | 0.0720 |
|                      |          | 2      | 0.0874 | 0.1065 | 0.5390 | 0.1503 | 0.0343 | 0.1659 | 0.1513 | 0.0287 | 0.1592 | 0.1472 | 0.0328 | 0.1823 |
|                      |          |        |        |        |        | 0.1626 | 0.0201 | 0.0967 | 0.1547 | 0.0253 | 0.1406 | 0.1543 | 0.0257 | 0.1427 |
|                      |          | 3      | 0.0874 | 0.1065 | 0.5390 | 0.1503 | 0.0343 | 0.1659 | 0.1513 | 0.0287 | 0.1592 | 0.1472 | 0.0328 | 0.1823 |
|                      |          |        |        |        |        | 0.1626 | 0.0201 | 0.0967 | 0.1547 | 0.0253 | 0.1406 | 0.1543 | 0.0257 | 0.1427 |
|                      | (80,24)  | 1      | 0.1714 | 0.0948 | 0.4091 | 0.2089 | 0.0306 | 0.1632 | 0.2090 | 0.0290 | 0.1613 | 0.2067 | 0.0267 | 0.1484 |
|                      |          |        |        |        |        | 0.1726 | 0.0093 | 0.0433 | 0.1727 | 0.0073 | 0.0406 | 0.1723 | 0.0077 | 0.0426 |
|                      |          | 2      | 0.0480 | 0.1569 | 0.8999 | 0.2025 | 0.0247 | 0.1253 | 0.2028 | 0.0228 | 0.1265 | 0.1575 | 0.0225 | 0.1250 |
|                      |          |        |        |        |        | 0.1647 | 0.0161 | 0.0849 | 0.1648 | 0.0152 | 0.0845 | 0.1645 | 0.0155 | 0.0862 |
|                      |          | 3      | 0.0043 | 0.1659 | 0.9364 | 0.1589 | 0.0266 | 0.1253 | 0.2028 | 0.0228 | 0.1265 | 0.1575 | 0.0225 | 0.1250 |
|                      |          |        |        |        |        | 0.1647 | 0.0161 | 0.0849 | 0.1648 | 0.0152 | 0.0845 | 0.1645 | 0.0155 | 0.0862 |
|                      | (80,64)  | 1      | 0.1715 | 0.0640 | 0.2905 | 0.1941 | 0.0216 | 0.0929 | 0.1948 | 0.0148 | 0.0820 | 0.1921 | 0.0122 | 0.0671 |
|                      |          |        |        |        |        | 0.1781 | 0.0063 | 0.0709 | 0.1782 | 0.0019 | 0.0100 | 0.1778 | 0.0022 | 0.0122 |
|                      |          | 2      | 0.0873 | 0.1004 | 0.5182 | 0.1589 | 0.0226 | 0.1216 | 0.1594 | 0.0206 | 0.1143 | 0.2018 | 0.0218 | 0.1210 |
|                      |          |        |        |        |        | 0.1700 | 0.0123 | 0.0609 | 0.1702 | 0.0098 | 0.0546 | 0.1696 | 0.0104 | 0.0579 |
|                      |          | 3      | 0.0873 | 0.1004 | 0.5182 | 0.2025 | 0.0247 | 0.1216 | 0.1594 | 0.0206 | 0.1143 | 0.2018 | 0.0218 | 0.1210 |
|                      |          |        |        |        |        | 0.1700 | 0.0123 | 0.0609 | 0.1702 | 0.0098 | 0.0546 | 0.1696 | 0.0104 | 0.0579 |
| 2.5                  | (40,12)  | 1      | 0.2161 | 0.1616 | 0.6432 | 0.1434 | 0.0409 | 0.2040 | 0.1445 | 0.0355 | 0.1970 | 0.1400 | 0.0400 | 0.2221 |
|                      |          |        |        |        |        | 0.1680 | 0.0130 | 0.0669 | 0.1681 | 0.0119 | 0.0661 | 0.1678 | 0.0122 | 0.0677 |
|                      |          | 2      | 0.2012 | 0.1211 | 0.5047 | 0.1449 | 0.0396 | 0.1966 | 0.1460 | 0.0340 | 0.1887 | 0.2120 | 0.0385 | 0.2138 |
|                      |          |        |        |        |        | 0.1682 | 0.0129 | 0.0662 | 0.1682 | 0.0117 | 0.0653 | 0.1679 | 0.0120 | 0.0669 |
|                      |          | 3      | 0.2000 | 0.1128 | 0.4741 | 0.1464 | 0.0383 | 0.1896 | 0.1476 | 0.0324 | 0.1801 | 0.1431 | 0.0369 | 0.2049 |
|                      |          |        |        |        |        | 0.1680 | 0.0130 | 0.0672 | 0.1680 | 0.0120 | 0.0664 | 0.1677 | 0.0122 | 0.0680 |
|                      | (40,32)  | 1      | 0.1978 | 0.1093 | 0.4653 | 0.2128 | 0.0344 | 0.1822 | 0.2130 | 0.0330 | 0.1836 | 0.2120 | 0.0320 | 0.1779 |
|                      |          |        |        |        |        | 0.1707 | 0.0129 | 0.0577 | 0.1709 | 0.0091 | 0.0503 | 0.1700 | 0.0100 | 0.0556 |
|                      |          | 2      | 0.1959 | 0.1023 | 0.4388 | 0.2128 | 0.0344 | 0.1822 | 0.2130 | 0.0330 | 0.1836 | 0.1912 | 0.0320 | 0.1779 |
|                      |          |        |        |        |        | 0.1710 | 0.0126 | 0.0562 | 0.1712 | 0.0088 | 0.0487 | 0.1703 | 0.0097 | 0.0540 |
|                      |          | 3      | 0.1771 | 0.0995 | 0.4399 | 0.2121 | 0.0337 | 0.1784 | 0.2123 | 0.0324 | 0.1798 | 0.2114 | 0.0314 | 0.1744 |
|                      |          |        |        |        |        | 0.1712 | 0.0124 | 0.0552 | 0.1714 | 0.0086 | 0.0478 | 0.1705 | 0.0095 | 0.0528 |
|                      | (80,24)  | 1      | 0.2016 | 0.1187 | 0.4877 | 0.1935 | 0.0212 | 0.0908 | 0.1942 | 0.0143 | 0.0790 | 0.1915 | 0.0117 | 0.0649 |
|                      |          |        |        |        |        | 0.1722 | 0.0095 | 0.0450 | 0.1723 | 0.0077 | 0.0428 | 0.1719 | 0.0080 | 0.0447 |
|                      |          | 2      | 0.1917 | 0.0835 | 0.3560 | 0.1932 | 0.0209 | 0.0900 | 0.1938 | 0.0139 | 0.0770 | 0.1683 | 0.0117 | 0.0649 |
|                      |          |        |        |        |        | 0.1719 | 0.0096 | 0.0461 | 0.1720 | 0.0080 | 0.0443 | 0.1717 | 0.0083 | 0.0461 |
|                      |          | 3      | 0.1926 | 0.0807 | 0.3465 | 0.1938 | 0.0214 | 0.0919 | 0.1945 | 0.0146 | 0.0806 | 0.1918 | 0.0119 | 0.0658 |
|                      |          |        |        |        |        | 0.1724 | 0.0094 | 0.0442 | 0.1725 | 0.0075 | 0.0417 | 0.1721 | 0.0079 | 0.0437 |
|                      | (80,64)  | 1      | 0.1881 | 0.0771 | 0.3330 | 0.1702 | 0.0183 | 0.0900 | 0.1709 | 0.0091 | 0.0502 | 0.1683 | 0.0116 | 0.0642 |
|                      |          |        |        |        |        | 0.1764 | 0.0075 | 0.0339 | 0.1766 | 0.0035 | 0.0191 | 0.1761 | 0.0039 | 0.0218 |
|                      |          | 2      | 0.1869 | 0.0718 | 0.3119 | 0.1702 | 0.0183 | 0.0895 | 0.1709 | 0.0091 | 0.0502 | 0.1415 | 0.0113 | 0.0623 |
|                      |          |        |        |        |        | 0.1763 | 0.0076 | 0.0343 | 0.1764 | 0.0036 | 0.0199 | 0.1759 | 0.0041 | 0.0226 |
|                      |          | 3      | 0.1635 | 0.0709 | 0.3153 | 0.1710 | 0.0183 | 0.0901 | 0.1718 | 0.0082 | 0.0455 | 0.1690 | 0.0110 | 0.0611 |
|                      |          |        |        |        |        | 0.1764 | 0.0075 | 0.0339 | 0.1766 | 0.0035 | 0.0191 | 0.1761 | 0.0039 | 0.0218 |

Table S7: The ACLs ( $1^{st}$  column) and CPs ( $2^{nd}$  column) of ACI/HPD credible intervals of  $\mu$ .

| $\mu$<br>Prior $\rightarrow$ | $T$ | $(n, m)$ | Scheme | ACI    |       | HPD    |       |        |       |
|------------------------------|-----|----------|--------|--------|-------|--------|-------|--------|-------|
|                              |     |          |        |        |       | P1     |       | P2     |       |
| 0.5                          | 0.5 | (40,12)  | 1      | 0.3510 | 0.924 | 0.1369 | 0.954 | 0.0560 | 0.974 |
|                              |     |          | 2      | 0.2714 | 0.929 | 0.1414 | 0.953 | 0.0532 | 0.975 |
|                              |     |          | 3      | 0.2493 | 0.933 | 0.1372 | 0.958 | 0.0552 | 0.973 |
|                              |     | (40,32)  | 1      | 0.2519 | 0.932 | 0.1076 | 0.959 | 0.0394 | 0.980 |
|                              |     |          | 2      | 0.2351 | 0.936 | 0.1055 | 0.960 | 0.0377 | 0.981 |
|                              |     |          | 3      | 0.2431 | 0.934 | 0.1044 | 0.961 | 0.0383 | 0.980 |
|                              |     | (80,24)  | 1      | 0.2565 | 0.930 | 0.1009 | 0.961 | 0.0479 | 0.978 |
|                              |     |          | 2      | 0.1896 | 0.945 | 0.1009 | 0.961 | 0.0482 | 0.977 |
|                              |     |          | 3      | 0.1749 | 0.949 | 0.1056 | 0.960 | 0.0461 | 0.979 |
|                              |     | (80,64)  | 1      | 0.1784 | 0.948 | 0.0611 | 0.972 | 0.0374 | 0.982 |
|                              |     |          | 2      | 0.1655 | 0.952 | 0.0611 | 0.972 | 0.0356 | 0.981 |
|                              |     |          | 3      | 0.1722 | 0.950 | 0.0623 | 0.971 | 0.0364 | 0.981 |
|                              | 2.5 | (40,12)  | 1      | 0.3491 | 0.925 | 0.1403 | 0.953 | 0.0543 | 0.976 |
|                              |     |          | 2      | 0.2697 | 0.931 | 0.1421 | 0.952 | 0.0531 | 0.975 |
|                              |     |          | 3      | 0.2493 | 0.933 | 0.1421 | 0.953 | 0.0537 | 0.975 |
|                              |     | (40,32)  | 1      | 0.2512 | 0.932 | 0.1076 | 0.959 | 0.0374 | 0.983 |
|                              |     |          | 2      | 0.2343 | 0.934 | 0.1055 | 0.960 | 0.0383 | 0.982 |
|                              |     |          | 3      | 0.2315 | 0.937 | 0.1044 | 0.960 | 0.0383 | 0.982 |
|                              |     | (80,24)  | 1      | 0.2554 | 0.935 | 0.1005 | 0.961 | 0.0490 | 0.977 |
|                              |     |          | 2      | 0.1889 | 0.945 | 0.1005 | 0.961 | 0.0482 | 0.977 |
|                              |     |          | 3      | 0.1749 | 0.949 | 0.1056 | 0.960 | 0.0461 | 0.979 |
|                              |     | (80,64)  | 1      | 0.1783 | 0.948 | 0.0605 | 0.973 | 0.0373 | 0.983 |
|                              |     |          | 2      | 0.1653 | 0.952 | 0.0605 | 0.972 | 0.0376 | 0.982 |
|                              |     |          | 3      | 0.1634 | 0.955 | 0.0605 | 0.973 | 0.0381 | 0.982 |
| 1.5                          | 0.5 | (40,12)  | 1      | 1.1435 | 0.902 | 0.1458 | 0.951 | 0.0628 | 0.973 |
|                              |     |          | 2      | 1.3298 | 0.896 | 0.1581 | 0.947 | 0.0663 | 0.971 |
|                              |     |          | 3      | 1.4334 | 0.894 | 0.1581 | 0.947 | 0.0663 | 0.971 |
|                              |     | (40,32)  | 1      | 0.8290 | 0.908 | 0.1002 | 0.962 | 0.0402 | 0.979 |
|                              |     |          | 2      | 0.8802 | 0.904 | 0.1371 | 0.955 | 0.0436 | 0.976 |
|                              |     |          | 3      | 0.8802 | 0.904 | 0.1371 | 0.955 | 0.0436 | 0.976 |
|                              |     | (80,24)  | 1      | 0.8443 | 0.906 | 0.0975 | 0.964 | 0.0377 | 0.982 |
|                              |     |          | 2      | 0.9724 | 0.902 | 0.0896 | 0.967 | 0.0511 | 0.975 |
|                              |     |          | 3      | 1.0272 | 0.900 | 0.0896 | 0.967 | 0.0511 | 0.975 |
|                              |     | (80,64)  | 1      | 0.5779 | 0.923 | 0.0645 | 0.972 | 0.0367 | 0.983 |
|                              |     |          | 2      | 0.6115 | 0.919 | 0.0606 | 0.975 | 0.0348 | 0.984 |
|                              |     |          | 3      | 0.6115 | 0.919 | 0.0606 | 0.975 | 0.0348 | 0.984 |
|                              | 2.5 | (40,12)  | 1      | 1.0813 | 0.899 | 0.1377 | 0.955 | 0.0593 | 0.968 |
|                              |     |          | 2      | 0.8372 | 0.907 | 0.1364 | 0.956 | 0.0584 | 0.970 |
|                              |     |          | 3      | 0.7785 | 0.914 | 0.1377 | 0.955 | 0.0575 | 0.971 |
|                              |     | (40,32)  | 1      | 0.7982 | 0.911 | 0.1045 | 0.967 | 0.0449 | 0.976 |
|                              |     |          | 2      | 0.7424 | 0.917 | 0.1045 | 0.967 | 0.0451 | 0.975 |
|                              |     |          | 3      | 0.7566 | 0.915 | 0.1072 | 0.966 | 0.0449 | 0.976 |
|                              |     | (80,24)  | 1      | 0.8064 | 0.909 | 0.1003 | 0.962 | 0.0396 | 0.982 |
|                              |     |          | 2      | 0.5836 | 0.920 | 0.1001 | 0.962 | 0.0388 | 0.982 |
|                              |     |          | 3      | 0.5446 | 0.923 | 0.1003 | 0.962 | 0.0402 | 0.980 |
|                              |     | (80,64)  | 1      | 0.5668 | 0.925 | 0.0672 | 0.971 | 0.0370 | 0.984 |
|                              |     |          | 2      | 0.5225 | 0.927 | 0.0672 | 0.971 | 0.0375 | 0.983 |
|                              |     |          | 3      | 0.5354 | 0.929 | 0.0657 | 0.972 | 0.0370 | 0.983 |



Table S8: The ACLs ( $1^{st}$  column) and CPs ( $2^{nd}$  column) of ACI/HPD credible intervals of  $R(t)$ .

| $\mu$<br>Prior $\rightarrow$ | $T$ | $(n, m)$ | Scheme | ACI    |       | HPD    |       |        |       |
|------------------------------|-----|----------|--------|--------|-------|--------|-------|--------|-------|
|                              |     |          |        |        |       | P1     |       | P2     |       |
| 0.5                          | 0.5 | (40,12)  | 1      | 0.3102 | 0.925 | 0.1444 | 0.953 | 0.0544 | 0.979 |
|                              |     |          | 2      | 0.2614 | 0.929 | 0.1422 | 0.953 | 0.0531 | 0.980 |
|                              |     |          | 3      | 0.2427 | 0.932 | 0.1269 | 0.959 | 0.0539 | 0.979 |
|                              |     | (40,32)  | 1      | 0.2425 | 0.932 | 0.1091 | 0.967 | 0.0361 | 0.986 |
|                              |     |          | 2      | 0.2294 | 0.935 | 0.1067 | 0.968 | 0.0366 | 0.986 |
|                              |     |          | 3      | 0.2219 | 0.934 | 0.1082 | 0.967 | 0.0375 | 0.985 |
|                              |     | (80,24)  | 1      | 0.2241 | 0.936 | 0.0974 | 0.970 | 0.0480 | 0.983 |
|                              |     |          | 2      | 0.1853 | 0.940 | 0.0977 | 0.970 | 0.0482 | 0.983 |
|                              |     |          | 3      | 0.1725 | 0.943 | 0.1037 | 0.969 | 0.0460 | 0.982 |
|                              |     | (80,64)  | 1      | 0.1727 | 0.942 | 0.0675 | 0.975 | 0.0360 | 0.983 |
|                              |     |          | 2      | 0.1630 | 0.945 | 0.0675 | 0.975 | 0.0364 | 0.983 |
|                              |     |          | 3      | 0.1574 | 0.949 | 0.0675 | 0.975 | 0.0351 | 0.990 |
|                              | 2.5 | (40,12)  | 1      | 0.3093 | 0.926 | 0.1353 | 0.955 | 0.0538 | 0.979 |
|                              |     |          | 2      | 0.2613 | 0.926 | 0.1396 | 0.953 | 0.0533 | 0.980 |
|                              |     |          | 3      | 0.2427 | 0.932 | 0.1295 | 0.958 | 0.0542 | 0.979 |
|                              |     | (40,32)  | 1      | 0.2422 | 0.932 | 0.1088 | 0.967 | 0.0360 | 0.986 |
|                              |     |          | 2      | 0.2293 | 0.935 | 0.1067 | 0.968 | 0.0377 | 0.985 |
|                              |     |          | 3      | 0.2268 | 0.933 | 0.1082 | 0.967 | 0.0375 | 0.985 |
|                              |     | (80,24)  | 1      | 0.2237 | 0.937 | 0.0970 | 0.970 | 0.0490 | 0.982 |
|                              |     |          | 2      | 0.1853 | 0.940 | 0.0972 | 0.970 | 0.0482 | 0.983 |
|                              |     |          | 3      | 0.1725 | 0.943 | 0.1037 | 0.969 | 0.0460 | 0.982 |
|                              |     | (80,64)  | 1      | 0.1725 | 0.942 | 0.0673 | 0.975 | 0.0366 | 0.983 |
|                              |     |          | 2      | 0.1629 | 0.945 | 0.0676 | 0.975 | 0.0366 | 0.983 |
|                              |     |          | 3      | 0.1611 | 0.946 | 0.0670 | 0.975 | 0.0373 | 0.989 |
| 1.5                          | 0.5 | (40,12)  | 1      | 0.0336 | 0.978 | 0.0037 | 0.994 | 0.0018 | 0.995 |
|                              |     |          | 2      | 0.0117 | 0.985 | 0.0036 | 0.994 | 0.0019 | 0.995 |
|                              |     |          | 3      | 0.0092 | 0.982 | 0.0035 | 0.994 | 0.0019 | 0.995 |
|                              |     | (40,32)  | 1      | 0.0233 | 0.981 | 0.0036 | 0.995 | 0.0014 | 0.996 |
|                              |     |          | 2      | 0.0114 | 0.986 | 0.0034 | 0.995 | 0.0014 | 0.996 |
|                              |     |          | 3      | 0.0084 | 0.983 | 0.0034 | 0.995 | 0.0014 | 0.996 |
|                              |     | (80,24)  | 1      | 0.0248 | 0.980 | 0.0033 | 0.995 | 0.0012 | 0.998 |
|                              |     |          | 2      | 0.0081 | 0.987 | 0.0025 | 0.996 | 0.0012 | 0.998 |
|                              |     |          | 3      | 0.0071 | 0.989 | 0.0025 | 0.996 | 0.0012 | 0.998 |
|                              |     | (80,64)  | 1      | 0.0172 | 0.983 | 0.0025 | 0.996 | 0.0011 | 0.998 |
|                              |     |          | 2      | 0.0060 | 0.990 | 0.0023 | 0.996 | 0.0010 | 0.998 |
|                              |     |          | 3      | 0.0054 | 0.992 | 0.0023 | 0.996 | 0.0010 | 0.998 |
|                              | 2.5 | (40,12)  | 1      | 0.0406 | 0.968 | 0.0036 | 0.994 | 0.0018 | 0.995 |
|                              |     |          | 2      | 0.0294 | 0.976 | 0.0035 | 0.994 | 0.0017 | 0.995 |
|                              |     |          | 3      | 0.0272 | 0.977 | 0.0036 | 0.994 | 0.0017 | 0.995 |
|                              |     | (40,32)  | 1      | 0.0276 | 0.977 | 0.0033 | 0.995 | 0.0015 | 0.996 |
|                              |     |          | 2      | 0.0255 | 0.978 | 0.0033 | 0.995 | 0.0016 | 0.996 |
|                              |     |          | 3      | 0.0228 | 0.979 | 0.0034 | 0.995 | 0.0017 | 0.996 |
|                              |     | (80,24)  | 1      | 0.0286 | 0.977 | 0.0032 | 0.995 | 0.0012 | 0.998 |
|                              |     |          | 2      | 0.0198 | 0.981 | 0.0032 | 0.996 | 0.0012 | 0.998 |
|                              |     |          | 3      | 0.0186 | 0.982 | 0.0033 | 0.996 | 0.0012 | 0.998 |
|                              |     | (80,64)  | 1      | 0.0188 | 0.982 | 0.0026 | 0.996 | 0.0011 | 0.998 |
|                              |     |          | 2      | 0.0172 | 0.983 | 0.0026 | 0.996 | 0.0011 | 0.998 |
|                              |     |          | 3      | 0.0150 | 0.984 | 0.0026 | 0.996 | 0.0011 | 0.998 |

Table S9: The ACLs ( $1^{st}$  column) and CPs ( $2^{nd}$  column) of ACI/HPD credible intervals of  $h(t)$ .

| $\mu$<br>Prior $\rightarrow$ | $T$ | $(n, m)$ | Scheme | ACI    |       | HPD    |       |        |       |
|------------------------------|-----|----------|--------|--------|-------|--------|-------|--------|-------|
|                              |     |          |        |        |       | P1     |       | P2     |       |
| 0.5                          | 0.5 | (40,12)  | 1      | 1.8306 | 0.892 | 0.7722 | 0.925 | 0.3097 | 0.954 |
|                              |     |          | 2      | 1.4892 | 0.899 | 0.7993 | 0.923 | 0.2988 | 0.955 |
|                              |     |          | 3      | 1.3766 | 0.903 | 0.8063 | 0.922 | 0.3060 | 0.954 |
|                              |     | (40,32)  | 1      | 1.3832 | 0.901 | 0.6100 | 0.931 | 0.2063 | 0.962 |
|                              |     |          | 2      | 1.3012 | 0.906 | 0.5970 | 0.930 | 0.2085 | 0.962 |
|                              |     |          | 3      | 1.2933 | 0.908 | 0.5993 | 0.930 | 0.2129 | 0.960 |
|                              |     | (80,24)  | 1      | 1.3314 | 0.903 | 0.5558 | 0.935 | 0.2697 | 0.958 |
|                              |     |          | 2      | 1.0511 | 0.918 | 0.5568 | 0.935 | 0.2712 | 0.957 |
|                              |     |          | 3      | 0.9748 | 0.915 | 0.5873 | 0.932 | 0.2591 | 0.960 |
|                              |     | (80,64)  | 1      | 0.9837 | 0.914 | 0.3645 | 0.945 | 0.2064 | 0.962 |
|                              |     |          | 2      | 0.9219 | 0.921 | 0.3644 | 0.945 | 0.2083 | 0.963 |
|                              |     |          | 3      | 0.9182 | 0.920 | 0.3672 | 0.944 | 0.2007 | 0.965 |
|                              | 2.5 | (40,12)  | 1      | 1.8217 | 0.893 | 0.7362 | 0.929 | 0.3038 | 0.954 |
|                              |     |          | 2      | 1.4848 | 0.900 | 0.7887 | 0.924 | 0.2996 | 0.954 |
|                              |     |          | 3      | 1.3766 | 0.903 | 0.7454 | 0.928 | 0.3038 | 0.955 |
|                              |     | (40,32)  | 1      | 1.3797 | 0.902 | 0.6089 | 0.931 | 0.2083 | 0.962 |
|                              |     |          | 2      | 1.2984 | 0.907 | 0.5970 | 0.930 | 0.2084 | 0.962 |
|                              |     |          | 3      | 1.2837 | 0.909 | 0.5993 | 0.930 | 0.2129 | 0.960 |
|                              |     | (80,24)  | 1      | 1.3271 | 0.905 | 0.5533 | 0.936 | 0.2756 | 0.957 |
|                              |     |          | 2      | 1.0492 | 0.919 | 0.5543 | 0.935 | 0.2712 | 0.957 |
|                              |     |          | 3      | 0.9748 | 0.915 | 0.5873 | 0.932 | 0.2591 | 0.960 |
|                              |     | (80,64)  | 1      | 0.9824 | 0.914 | 0.3620 | 0.945 | 0.2060 | 0.962 |
|                              |     |          | 2      | 0.9210 | 0.921 | 0.3630 | 0.945 | 0.2133 | 0.962 |
|                              |     |          | 3      | 0.9108 | 0.921 | 0.3610 | 0.945 | 0.2119 | 0.963 |
|                              | 1.5 | (40,12)  | 1      | 0.5529 | 0.935 | 0.0613 | 0.973 | 0.0312 | 0.979 |
|                              |     |          | 2      | 0.2283 | 0.960 | 0.0619 | 0.972 | 0.0307 | 0.980 |
|                              |     |          | 3      | 0.2283 | 0.960 | 0.0631 | 0.971 | 0.0303 | 0.980 |
|                              |     | (40,32)  | 1      | 0.4005 | 0.943 | 0.0603 | 0.973 | 0.0213 | 0.984 |
|                              |     |          | 2      | 0.1802 | 0.965 | 0.0449 | 0.978 | 0.0208 | 0.984 |
|                              |     |          | 3      | 0.1645 | 0.968 | 0.0449 | 0.978 | 0.0216 | 0.984 |
|                              |     | (80,24)  | 1      | 0.4200 | 0.940 | 0.0604 | 0.973 | 0.0216 | 0.984 |
|                              |     |          | 2      | 0.1645 | 0.968 | 0.0616 | 0.974 | 0.0210 | 0.985 |
|                              |     |          | 3      | 0.0619 | 0.974 | 0.0303 | 0.985 | 0.0210 | 0.985 |
|                              |     | (80,64)  | 1      | 0.2971 | 0.954 | 0.0415 | 0.980 | 0.0192 | 0.988 |
|                              |     |          | 2      | 0.0809 | 0.971 | 0.0380 | 0.983 | 0.0178 | 0.989 |
|                              |     |          | 3      | 0.0380 | 0.983 | 0.0178 | 0.988 | 0.0130 | 0.991 |
|                              | 2.5 | (40,12)  | 1      | 0.6236 | 0.929 | 0.0619 | 0.973 | 0.0324 | 0.979 |
|                              |     |          | 2      | 0.4715 | 0.936 | 0.0650 | 0.970 | 0.0334 | 0.977 |
|                              |     |          | 3      | 0.4404 | 0.940 | 0.0650 | 0.970 | 0.0333 | 0.977 |
|                              |     | (40,32)  | 1      | 0.4485 | 0.938 | 0.0618 | 0.973 | 0.0210 | 0.984 |
|                              |     |          | 2      | 0.4166 | 0.942 | 0.0600 | 0.978 | 0.0275 | 0.981 |
|                              |     |          | 3      | 0.3823 | 0.945 | 0.0604 | 0.978 | 0.0275 | 0.981 |
|                              |     | (80,24)  | 1      | 0.4598 | 0.936 | 0.0565 | 0.975 | 0.0246 | 0.982 |
|                              |     |          | 2      | 0.3288 | 0.950 | 0.0565 | 0.976 | 0.0247 | 0.982 |
|                              |     |          | 3      | 0.3092 | 0.954 | 0.0582 | 0.975 | 0.0246 | 0.982 |
|                              |     | (80,64)  | 1      | 0.3152 | 0.952 | 0.0438 | 0.980 | 0.0194 | 0.988 |
|                              |     |          | 2      | 0.2903 | 0.954 | 0.0438 | 0.979 | 0.0198 | 0.988 |
|                              |     |          | 3      | 0.2608 | 0.957 | 0.0431 | 0.980 | 0.0194 | 0.988 |

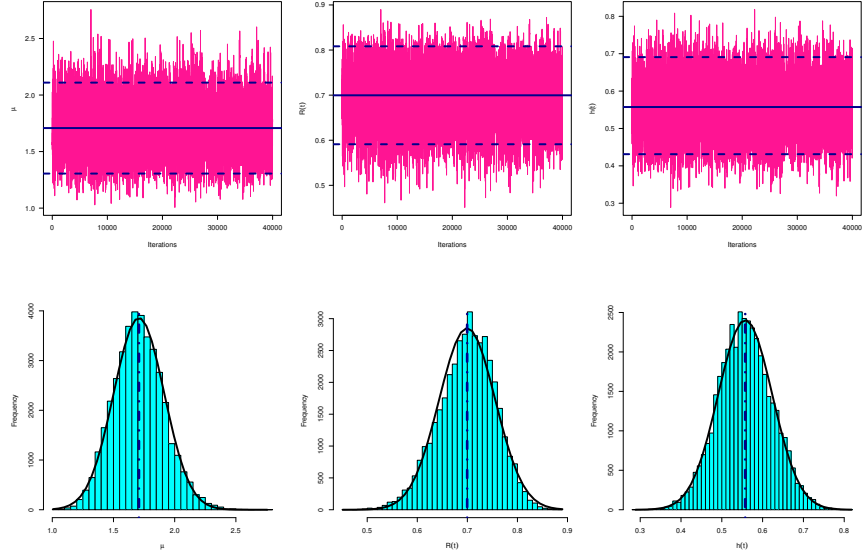

Figure S1: Trace (top) and Histograms (bottom) plots of  $\mu$ ,  $R(t)$  and  $h(t)$  under sample 2 from ACT data.

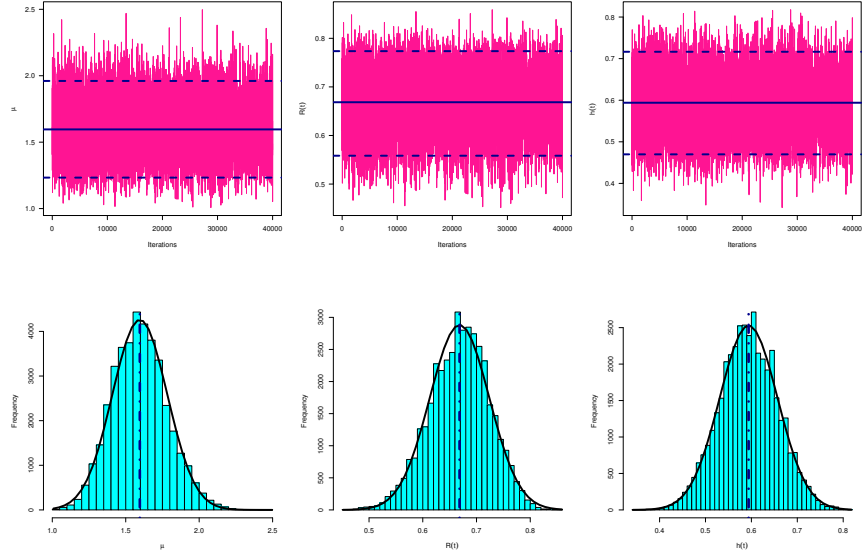

Figure S2: Trace (top) and Histograms (bottom) plots of  $\mu$ ,  $R(t)$  and  $h(t)$  under sample 3 from ACT data.

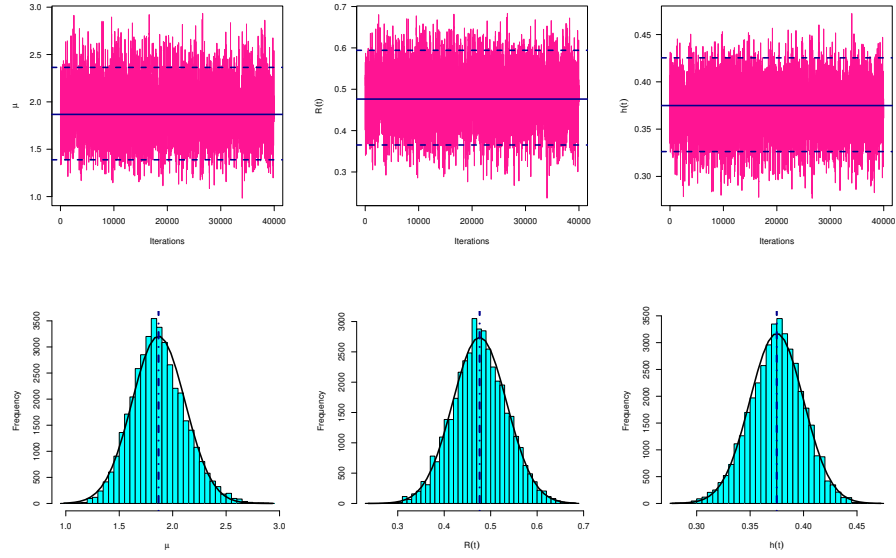

Figure S3: Trace (top) and Histograms (bottom) plots of  $\mu$ ,  $R(t)$  and  $h(t)$  under sample 2 from wooden toys data.

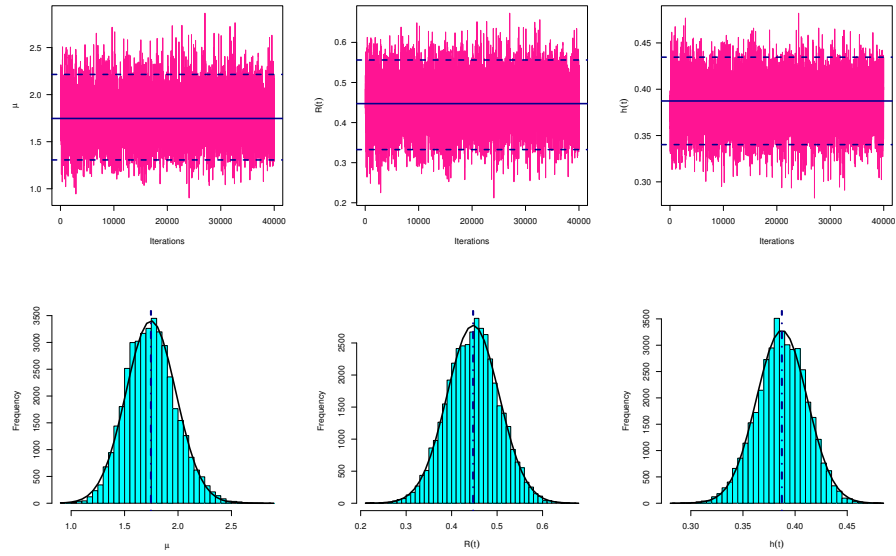

Figure S4: Trace (top) and Histograms (bottom) plots of  $\mu$ ,  $R(t)$  and  $h(t)$  under sample 3 from wooden toys data.
